# Supplementary material for: Effect of Antibiotic Eye Drops on the Nasal Microbiome in Healthy Subjects—A Pilot Study
Source: MDPI journal article supplement (doi:10.3390/antibiotics12030517), 2023-03-04
Supplement: s1 [file s1]

# Effect of Antibiotic Eye Drops on the Nasal Microbiome in Healthy Subjects – A pilot study

## Supplement

### Microbial richness in pharyngeal samples

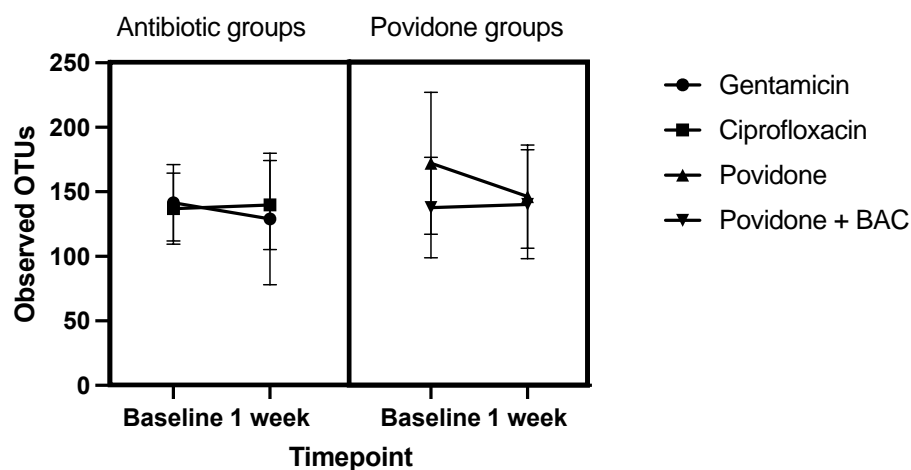

**Figure S1.** Microbial richness in pharyngeal samples. Comparison of OTUs before and after treatment (Baseline: before instillation of eye drops, 1 week: after 7 days instillation). Sequences are clustered according to their similarity to another. Group 1 received gentamicin eye drops, group 2 ciprofloxacin, group 3 topical lubricants containing povidone only, group 4 received topical lubricants containing povidone and BAC.

### Phylogenetic diversity in pharyngeal samples

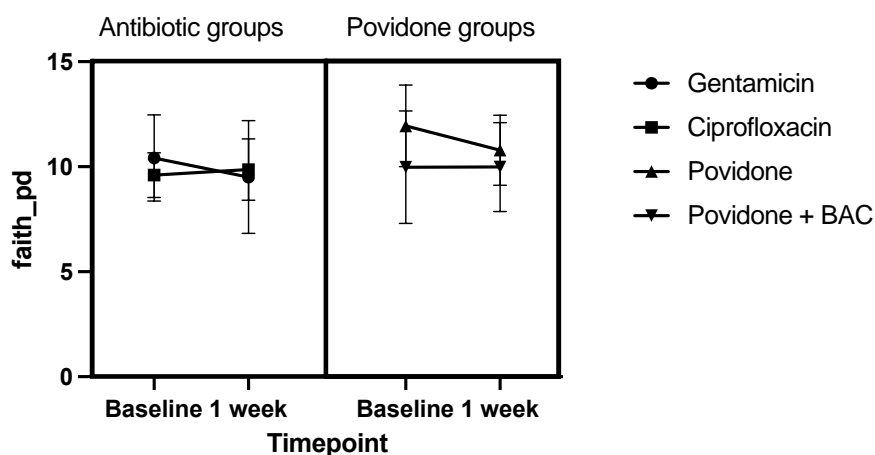

**Figure S2.** Faith's PD in pharyngeal samples, meaning the sum of the branch lengths of a phylogenetic tree connecting all species in the target assemblage. Comparison of the phylogenetic diversity index before and after treatment (Baseline: before instillation of eye drops, 1 week: after 7 days instillation). Group 1 received gentamicin eye drops, group 2 ciprofloxacin, group 3 topical lubricants containing povidone only, group 4 received topical lubricants containing povidone and BAC.

# Effect of Antibiotic Eye Drops on the Nasal Microbiome in Healthy Subjects – A pilot study

## Supplement

An excerpt of our results regarding the change in relative abundance of the major bacterial genera in the pharyngeal bacterium is shown in figure 3: Staphylococcus, and figure 4: Streptococcus.

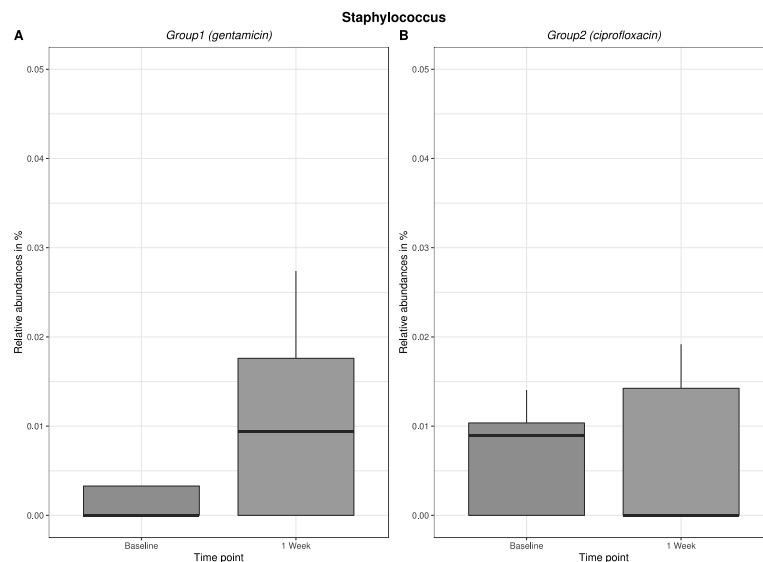

**Figure S3:** The change in relative abundance in % (Staphylococcus/pharyngeal) after 1-week use of gentamicin or ciprofloxacin eye drops. Figure A shows the change in relative abundance in % in group 1, which received gentamicin for one week. Figure B shows the change in relative abundance in % in group 2, which received ciprofloxacin for one week.

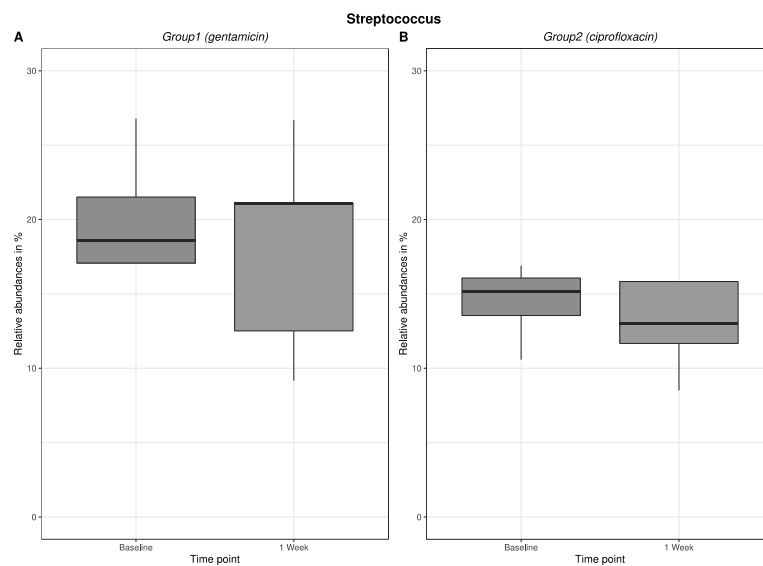

**Figure S4:** The change in relative abundance in % (Streptococcus/pharyngeal) after 1-week use of gentamicin or ciprofloxacin eye drops. Figure A shows the change in relative abundance in % in group 1, which received gentamicin for one week. Figure B shows the change in relative abundance in % in group 2, which received ciprofloxacin for one week.
